# Supplementary material for: Homeostatic Synaptic Scaling Establishes the Specificity of an Associative Memory
Source: bioRxiv or medRxiv preprint supplement (doi:10.1101/2020.12.04.412163), 2020-12-04

**a**

24 Hr Gen. Test

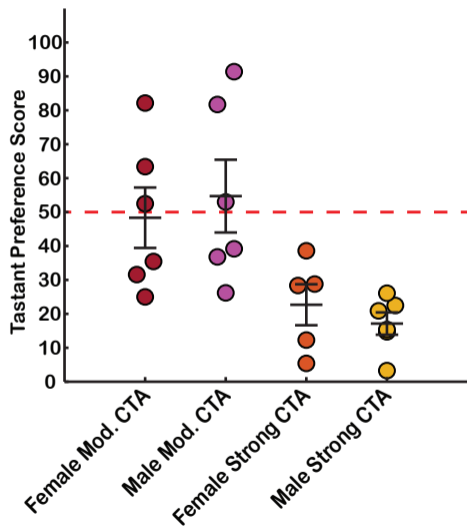**b**

CTA Test

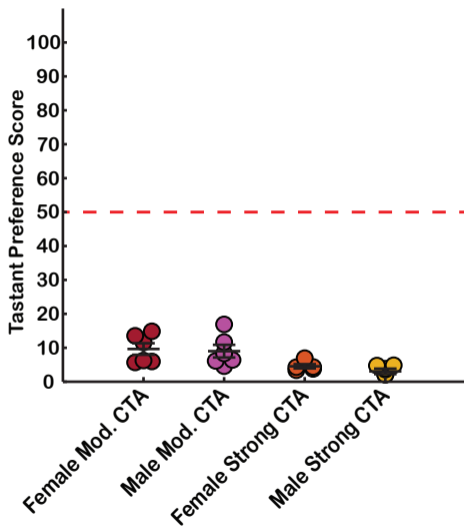

**a** Fig. 1b Conditioning Trial Data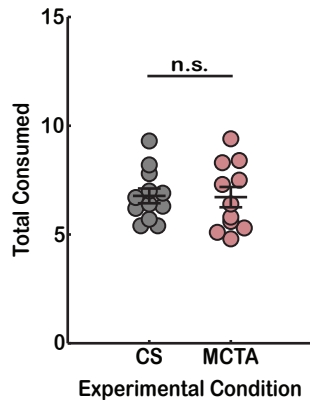**b** Fig. 1c Conditioning Trial Data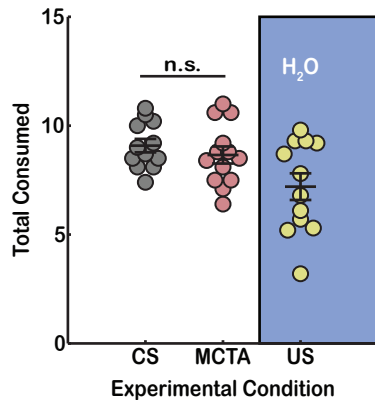**c** Fig. 1d Conditioning Trial Data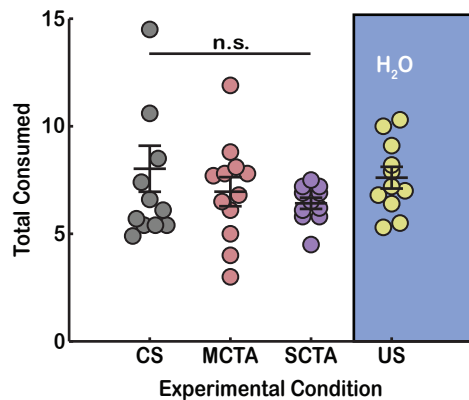**d** Fig. 1c CTA Test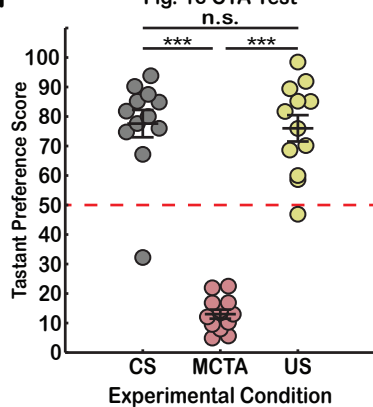**e** Fig. 1d CTA Test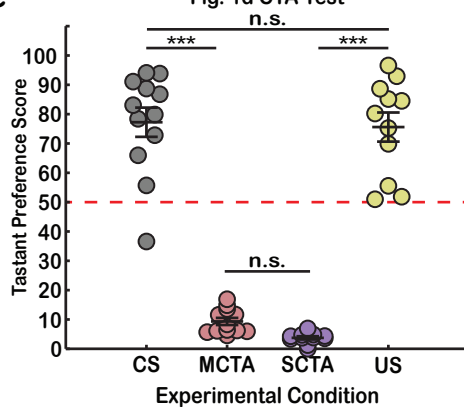

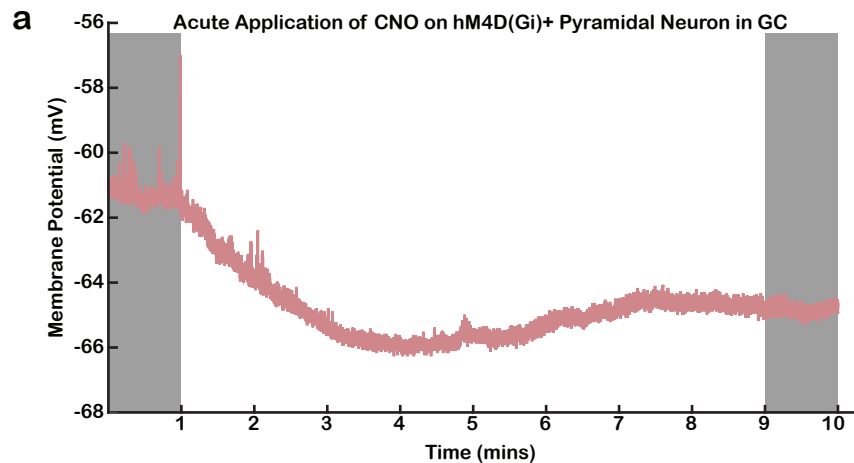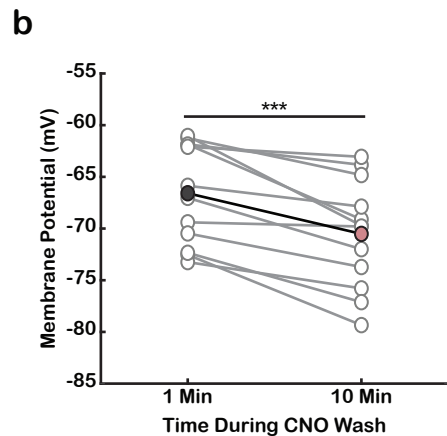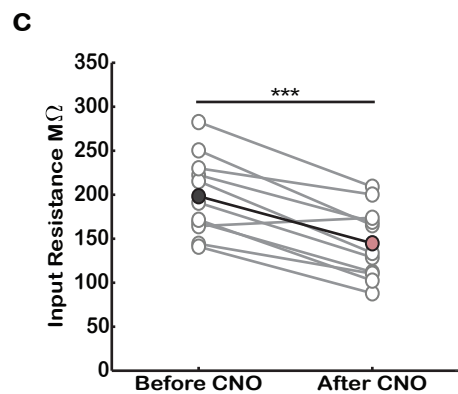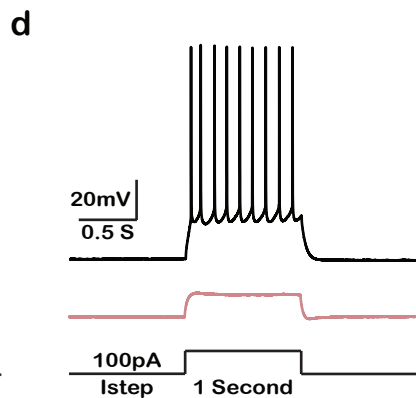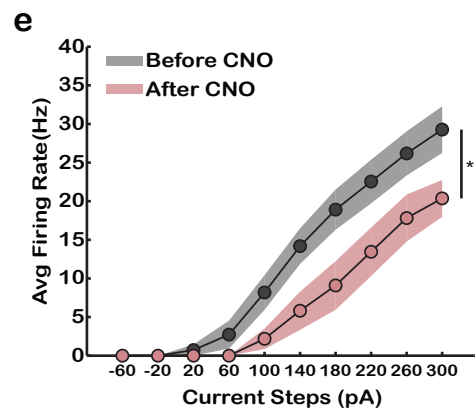

**a**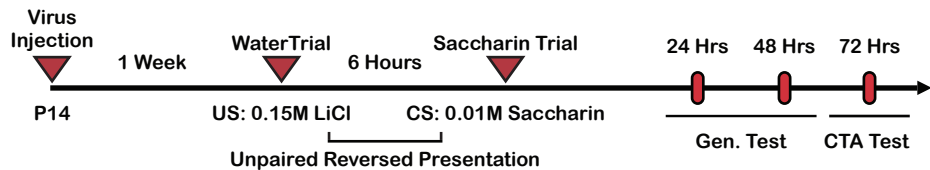**b**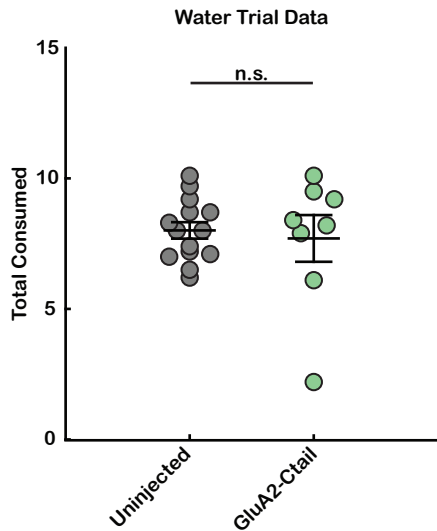**c**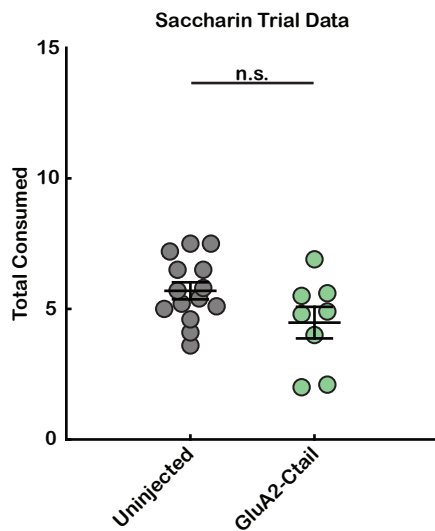**d**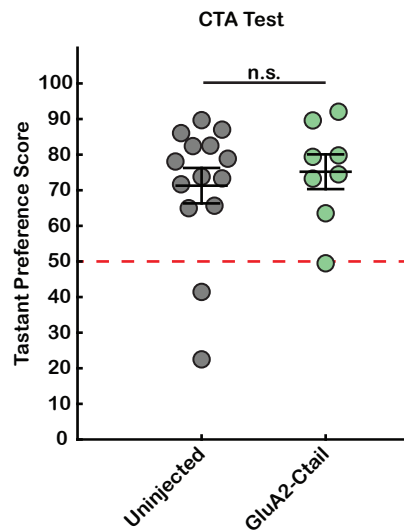

**a** Gen. Test 24 Hrs Post-Conditioning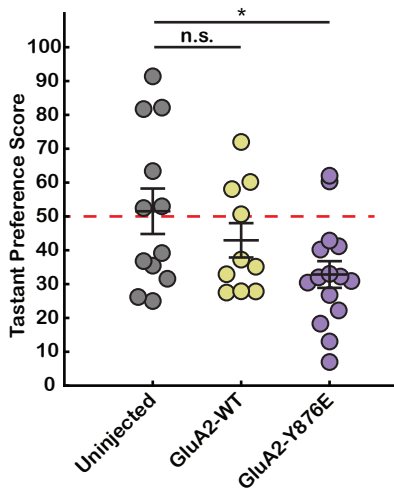**b** GluA2-WT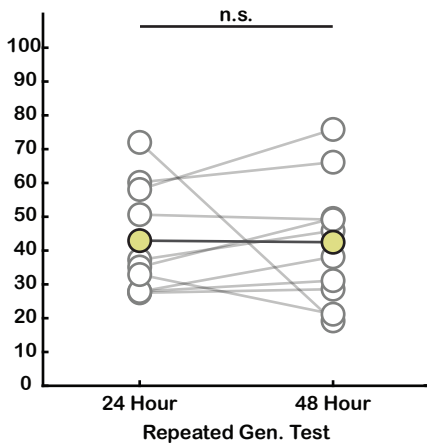**c** GluA2-Y876E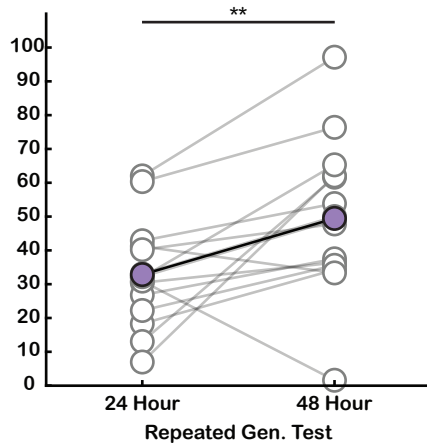

**a** Fig. 3c Conditioning Trial Data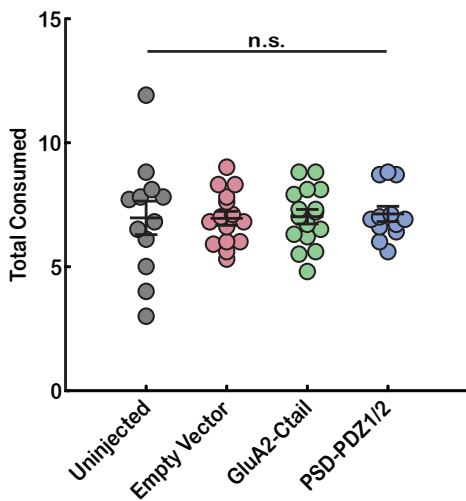**b** SFig. 4 Conditioning Trial Data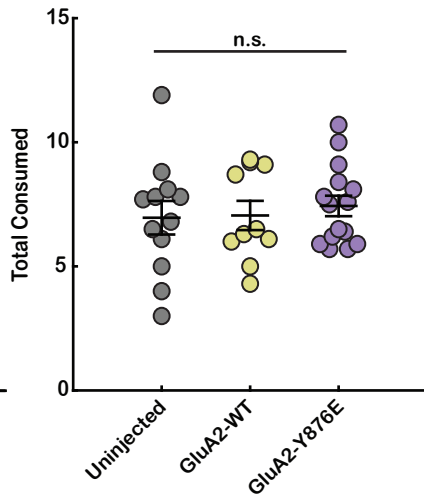**c** Fig. 3c CTA Test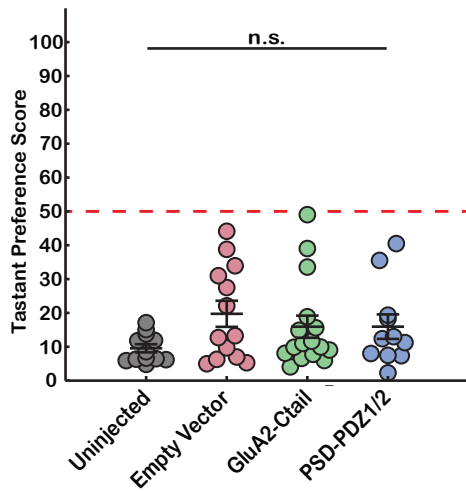**d** SFig. 4 CTA Test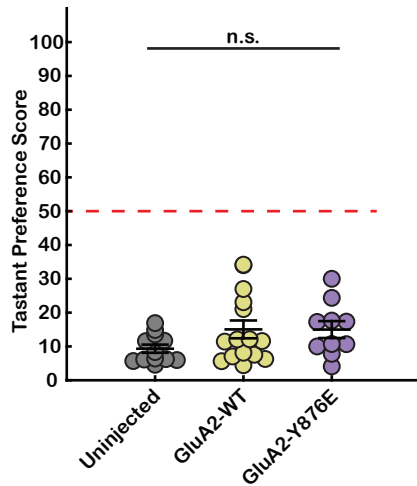

**a**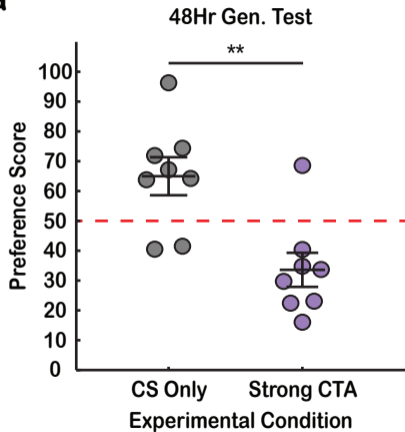**b**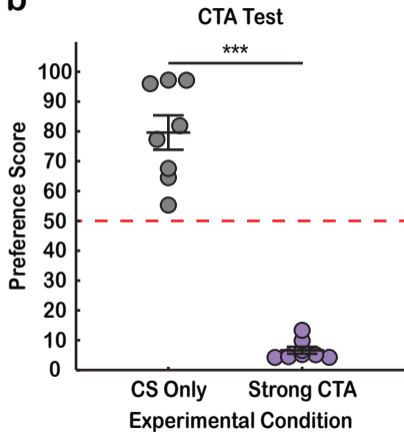

**a**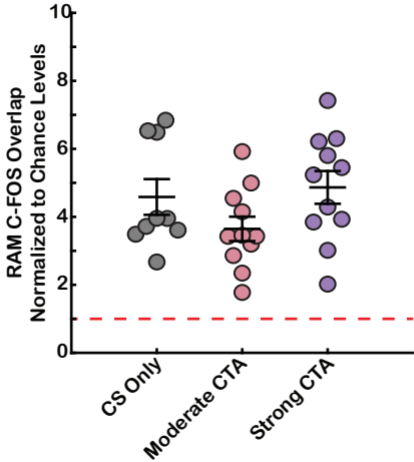

Supplement: Supplementary file [file media-1.pdf]
